# Supplementary material for: Medial thalamic stroke and its impact on familiarity and recollection
Source: eLife journal article supplement (doi:10.7554/elife.28141), 2017-08-24
Supplement: supp [file elife_poa_e28141_Supplementary_File1.xls]

## Sheet: Danet_data
Subject	group: Patients (P) / Healthy Controls (HC)	PDP_global performance (d')	PDP_Criterion	PDP_Recollection	PDP_Familiarity	ROC_global performance (d')	ROC_Criterion	ROC_Recollection	ROC_Familiarity	RKG_global performance (d')	RKG_Criterion	RKG_Recollection	RKG_Familiarity	FCSRT_delayed total recall /16	FCSRT_Recognition /48	Logical memory_delayed recall /50	Logical memory_recognition /30	Rey figure_delayed recall /36	DMS48_delayed forced choice /48	Auditory-verbal span (scaled score)	Visuospatial span (scaled score)	Digit symbol (scaled score)	Stroop_errors	Literal fluency (p)_nb words	Semantic fluency (animals)_nb words	Confrontation naming /36	Starkstein apathy scale /42	Beck depression inventory	Spielberger state-trait anxiety /80
ALHE_30	P	0.617722	-0.819283	0.125	0.2	0.53	-0.15973	0	0.56	0.421973	-0.502718	0.0166667	0.370671	1	41	3	16	3	45	4		6	1	16	22	34	18	8	39
CECE_17	P	1.40986	-0.123536	0.325	0.592593	0.99	-0.328844	0.38	0.25	0.7641	-0.132944	0.109091	1.33095	12	48	27	26	18	48	8	5	5	0	15	22	33	7	6	51
DEFR_46	P	1.47784	-0.2285	0.375	0.52	1.37748	-0.394529	0.305949	0.90888	0.449624	-0.787319	0.105263	0.0482885	12	48	37	27	32	48	12	13	7	0	14	40	36	0	0	41
DUGI_32	P	0.365393	-1.41052	0.025	0.0769231	0.48	-1.33699	0	0.61	0.502495	-1.19702	0.0166667	0.408977	3	38	6	16	29	48	8	13	9	4	17	18	32	12	4	34
FISE_45	P	2.01011	0.78671	0.4	0.958333	1.17581	0.587907	0	1.20103	1.12437	0.521083	0.5	0.856256	13	48	36	28	15.5	48	11	10	9	0	13	25	36	6	0	36
FOAY_1	P	0.222874	-0.553372	-0.025	0.341463	0.56	0.195256	0	0.46	0.176884	-0.380174	0	0.188101	0	43	8	18	10	47	7	10	12	0	20	26	35	6	3	39
FOTH_5	P	1.16617	-0.336048	0.3	0.428571	1.68	-0.500989	0.41	1.02	1.48148	0.0270334	0.140351	1.55181	13	48	25	27	31	47	12	11	10	0	23	33	36	9	0	37
HODA_37	P	1.5285	-0.253827	0.4	0.5	1.22	-1.12952	0	1.27	1.02125	-1.4564	0.0166667	0.965876	7	45	11	25	21.5	47	12	16	11	4	13	18	26	10	0	28
PAEL_3	P	1.13266	-0.505156	0.25	0.366667	2.08	-1.35798	0.21	0.86	1.06219	-1.04609	0.116667	0.963269	7	46	17	26	21	44	8	9	6	1	11	22	34	12	3
RAGE_19	P	1.14066	-0.447747	0.3	0.357143	-0.07	-0.239788	0	0	0.399638	-1.53957	-0.0172414	0.948217	3	5	20	23	19	48	14	12	12	0	18	25	26	13	5	36
RIJE_2	P	0.604829	-0.179834	0.125	0.485714	0.46	0.437465	0.05	0.49	0.777239	0.951127	0.0344828	0.530797	0	44	5	17	20.5	46	7	9	11	0	20	23	31	10	1	38
ROMA_9	P	0.497192	-0.00155694	0.025	0.589744	0.75	0.123489	0.25	0.49	0.374009	0.104727	0.0943396	0.139759	0	37	16	20	13	48	7	11	10	0	8	16	33	8	4	39
CAMA_24	HC	0.657871	-0.0183259	0.075	0.594595	1.56	-0.305241	0.59	0.15	2.10752	-0.285987	0.448276	1.14811	13	48	28	26	19.5	44	10	11	10	1	36	45	36	10	10	57
CAMAr_33	HC	3.21835	0.641752	0.675	1	1.77	-0.456402	0.58	0.52	1.78317	-0.556689	0.322034	1.42907	14	48	46	28	30	48	13	13	16	0	22	42	36	9	7	50
COMI_6	HC	1.47798	0.488837	0.2	0.875	2.3	-0.814628	0.56	1.16	1.17688	-1.15095	0.241379	0.103315	14	47	33	26	30	43	11	12	14	0	11	39	36	5	0	28
DERO_31	HC	1.33891	0.700404	0.075	0.918919	2.28	0.125403	0.86	0.45	2.28552	-0.196985	0.763636	1.487	16	48	29	23	31	47	12	14	12	0	23	40	35	4	0	23
DOJA_11	HC	1.47738	-0.00545348	0.375	0.64	1.02887	-0.368911	0.430563	0.0463378	1.17383	0.0244095	0.5	0.398111	12	48	32	28	22	45	10	10	8	2	27	41	36	6	3	40
FOSI_8	HC	1.22754	-0.171835	0.325	0.518519	1.4	-0.248015	0.47	0.62	0.868577	0.22736	0.391304	0.46449	12	48	26	25	20	48	9	12	10	0	30	32	36	8	8	56
GEJE_23	HC	1.02916	0.0668127	0.15	0.676471	1.44	-0.292594	0.32	1.11	1.17383	-0.0244095	0.444444	0.381602	10	48	26	26	17	38	14	12	10	0	32	55	36	8	1	24
GEMA_22	HC	1.26353	0.183999	0.2	0.75	1.63	-0.522767	0.56	0.3	1.61339	-0.641578	0.396552	0.706483	16	48	38	28	23.5	48	15	10	11	0	19	37	36	8	4	57
GRJE_20	HC	1.89261	0.160699	0.5	0.75	1.64	0.20639	0.4	1.26	1.33238	0.417082	0.410714	1.20979	14	48	38	23	27	47	15	16	13	0	24	53	36	6	0	41
LAPA_36	HC	1.21884	0.294848	0.275	0.758621	1.46	0.165206	0.09	1.46	1.53678	0.476657	0.333333	1.33618	16	47	40	26	34	47	12	14	14	0	27	51	36	9	1	30
LEGA_21	HC	1.45426	0.379871	0.15	0.852941	1.52	0.0450692	0.23	1.54	0.637268	-0.294453	0.316667	1.05717	14	48	40	28	23	47	13	11	11	0	26	34	36	19	6	48
LEJO_7	HC	1.39804	0.0342135	0.45	0.590909	1.01	0.298457	0.37	0.6	1.17725	0.423507	0.357143	0.396562	15	48	24	26	24	45	16	13	13	0	17	35	36	3	2	39
MALI_26	HC	2.30737	-0.33792	0.7	0.333333	2.08	0.37675	0.65	1.5	1.65948	-0.116036	0.636364	0.765592	16	48	44	29	28	48	13	13	11	0	28	38	35	9	5	51
METH_40	HC	1.72691	-0.208032	0.475	0.52381	1.71	-0.159003	0.61	0.77	2.50716	-0.485806	0.508475	1.18922	15	48	37	24	27	48	13	16	13	0	29	61	36	12	2	40
MODO_29	HC	1.4543	-0.145755	0.35	0.576923	1.49	-0.07809	0.41	0.93	1.5571	-0.167225	0.403509	1.10789	14	48	40	29	29.5	47	18	13	14	0	42	43	36	6	1	41
MOIS_41	HC	2.01011	0.78671	0.35	0.961538	1.54	0.645779	0	1.69	1.61339	0.641578	0.72093	1.29631	15	48	35	25	18	40	11	13	18	0	20	43	35	11	10	36
NEYV_48	HC	2.18916	-0.0940918	0.625	0.6	1.82836	-0.24618	0.38366	1.64707	2.27245	0.312045	0.865385	1.35089	16	48	39	25	34	47	12	19	14	0	23	32	36	14	6	41
POSY_28	HC	1.47738	-0.00545348	0.35	0.653846	2.18	-0.879181	0.48	0.34	1.12501	0	0.0508475	-0.41483	15	48	38	29	19	48	13	11	9	0	26	35	36	7	0	35
RAMA_42	HC	1.8441	-0.266625	0.575	0.411765	1.75	0.0500188	0	1.99	1.38669	-0.130837	0.5	0.35559	16	48	39	29	20	46	15	14	13	0	18	35	36	8	8	54
REGU_39	HC	2.06967	-0.21907	0.625	0.466667	1.6	-0.0243176	0.66	0.59	1.71355	0.0890028	0.679245	1.0055	15	48	39	28	30	48	10	14	12	6	21	45	35	1	0	26
RICA_4	HC	1.38332	-0.181241	0.4	0.5	1.21	0.227054	0.39	0.76	0.868577	-0.22736	0.101695	0.879146	13	48	30	28	24	46	10	10	11	0	30	47	36	10	0	34
ROSY_10	HC	1.7861	0.107443	0.425	0.73913	2.2	-0.350207	0.37	1.76	1.26124	-0.381512	0.375	0.637268	13	48	36	30	29	47	14	15	9	0	22	44	36	8	11	43
SEME_49	HC	1.98481	-0.41101	0.6	0.3125	1.68001	-0.320355	0.383911	1.35131	2.00041	-0.576978	0.433333	1.45341	15	48	40	30	28	47	15	9	10	0	37	50	36	3	0	29
VEGE_25	HC	2.4039	-0.201461	0.7	0.5	3.14	-0.395606	0.85	0.84	2.30189	-0.588438	0.672414	0.44255	16	48	40	29	17.5	48	12	14	13	0	36	38	36	17	13	46
VIAN_34	HC	1.78367	0.478023	0.325	0.888889	1.3	0.182091	0.5	0.79	1.30386	0.3602	0.321429	1.0383	15	48	31	27	28	47	15	13	10	0	21	49	35	2	1	38
